# Supplementary material for: Lowered dietary phosphorus affects intestinal and renal gene expression to maintain mineral homeostasis with immunomodulatory implications in weaned piglets
Source: PubMed Central journal article supplement (PMC5859397; doi:10.1186/s12864-018-4584-2), 2018-03-20
Supplement: 12864_2018_4584_MOESM4_ESM.pdf [file 12864_2018_4584_MOESM4_ESM.pdf]

Color Key

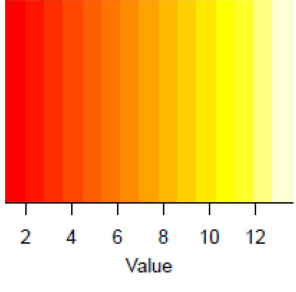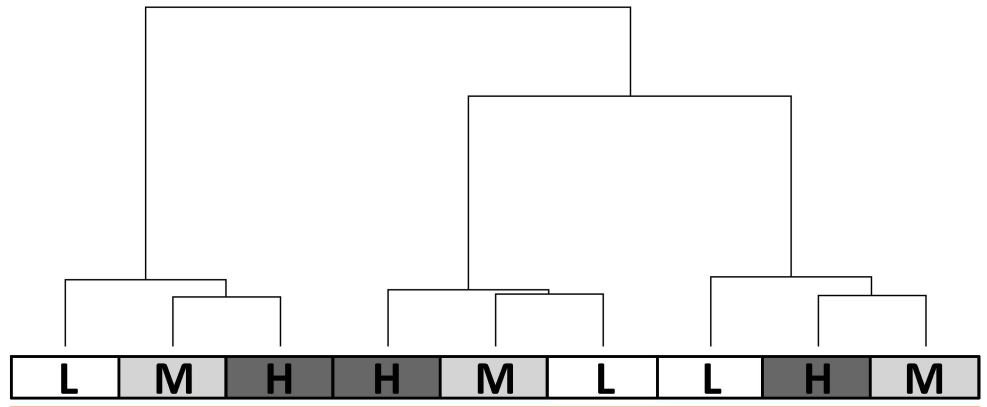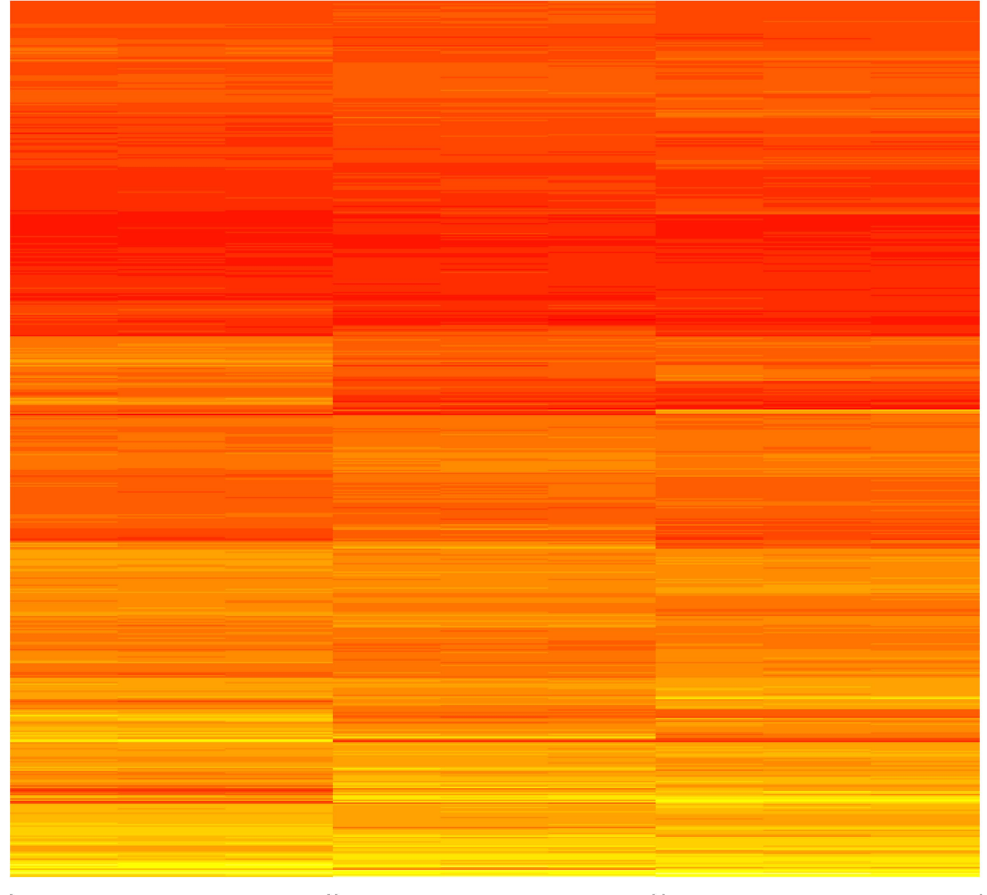

Kidney                      Colon                      Jejunum
