# Supplementary material for: Lowered dietary phosphorus affects intestinal and renal gene expression to maintain mineral homeostasis with immunomodulatory implications in weaned piglets
Source: PubMed Central journal article supplement (PMC5859397; doi:10.1186/s12864-018-4584-2), 2018-03-20

**CYP27A1**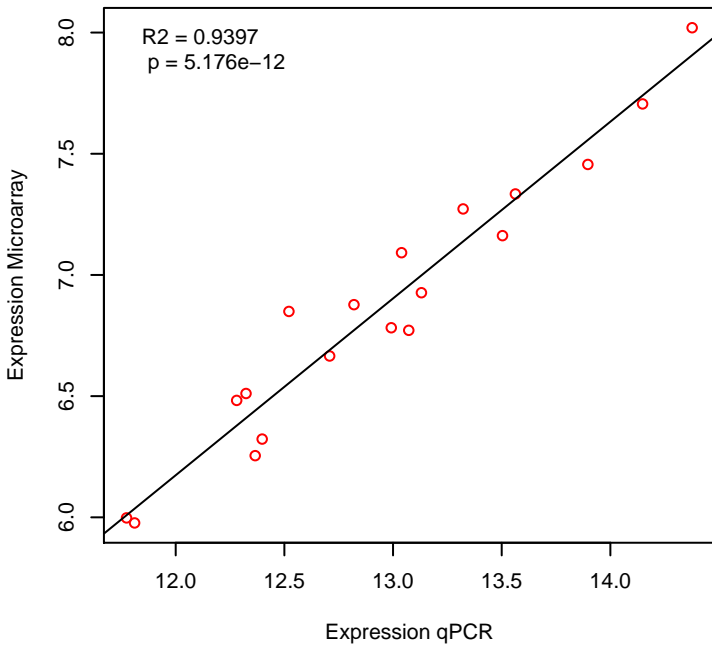**NFATC2**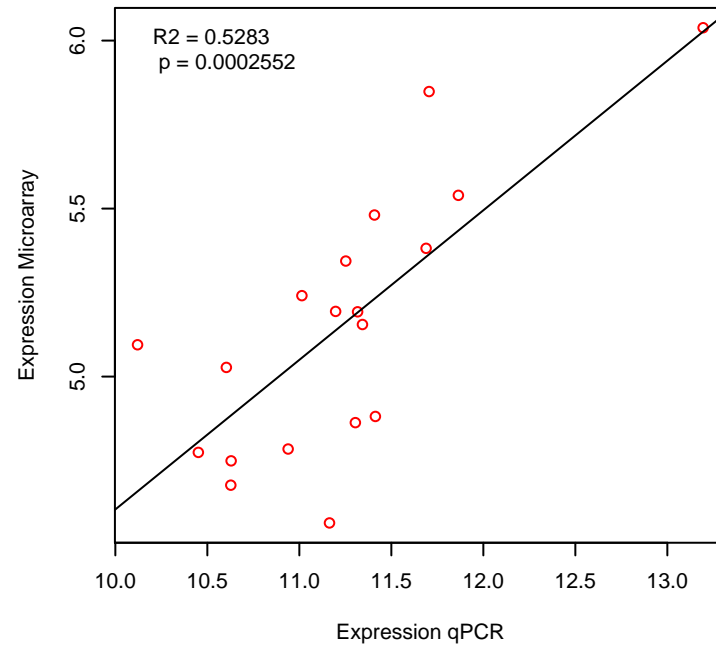**PTH1R**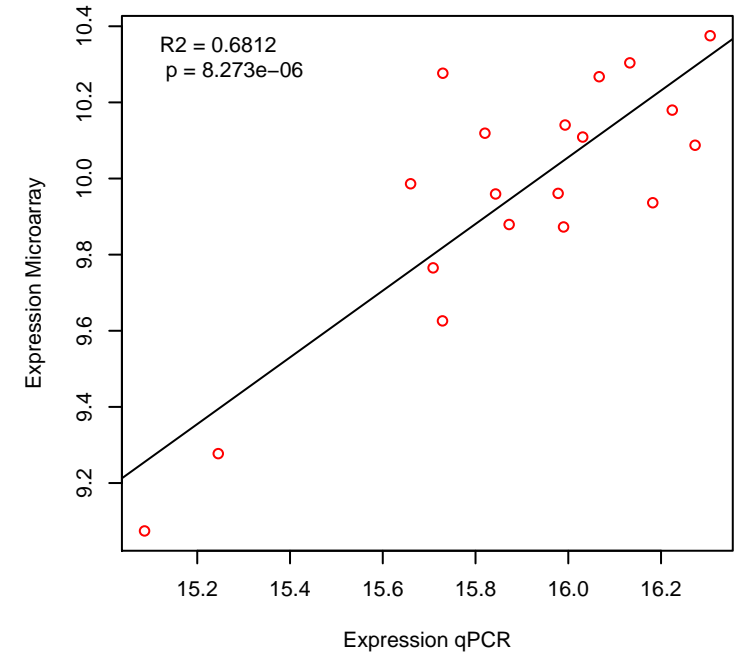**SLC34A3**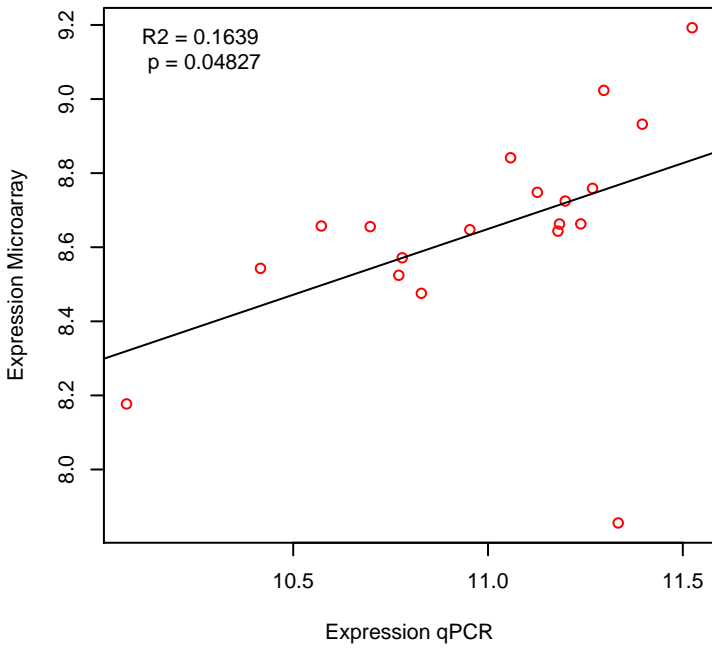**SPP1**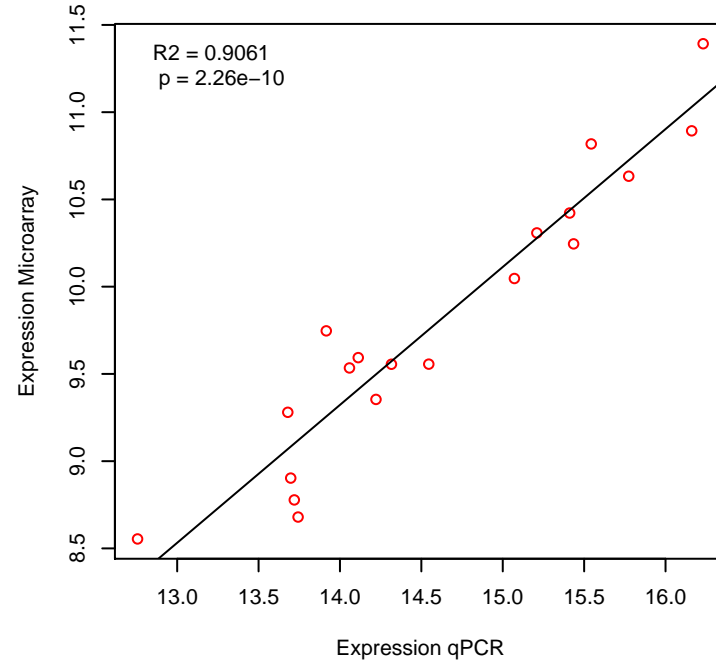**VDR**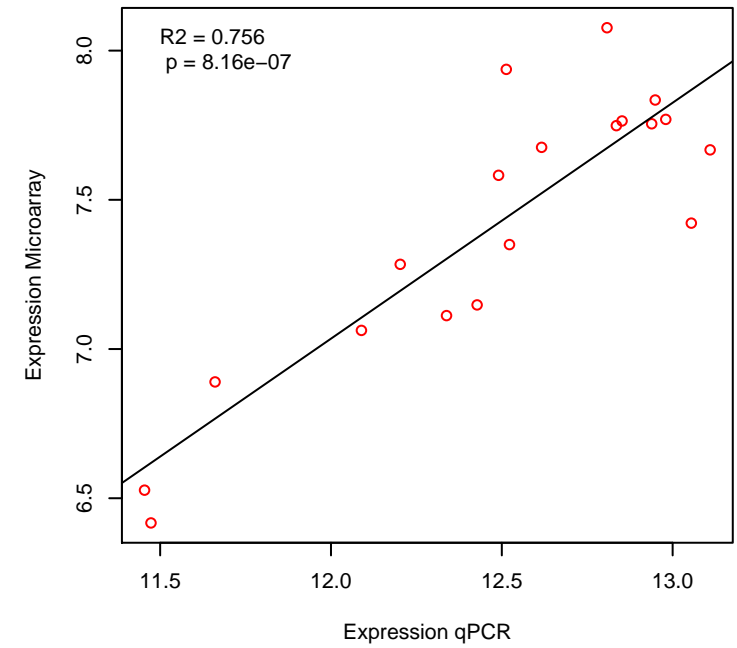

**CYP24A1**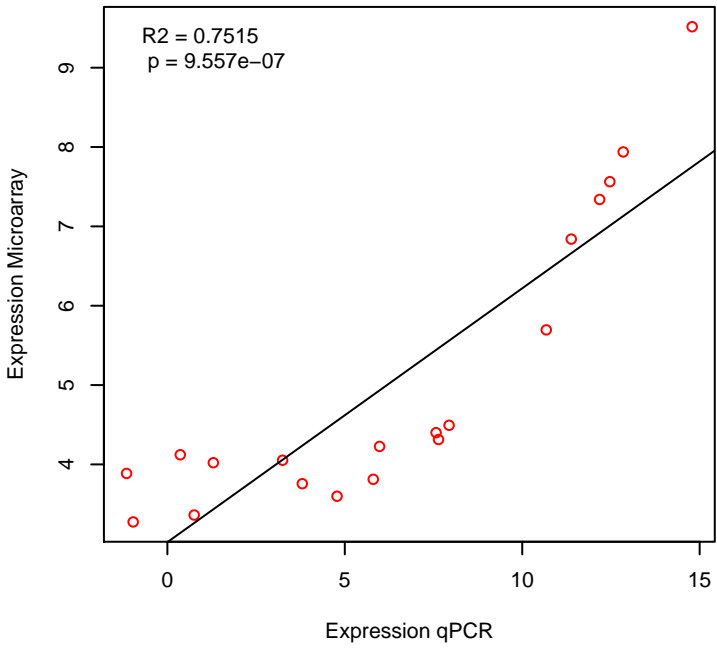**C1QC**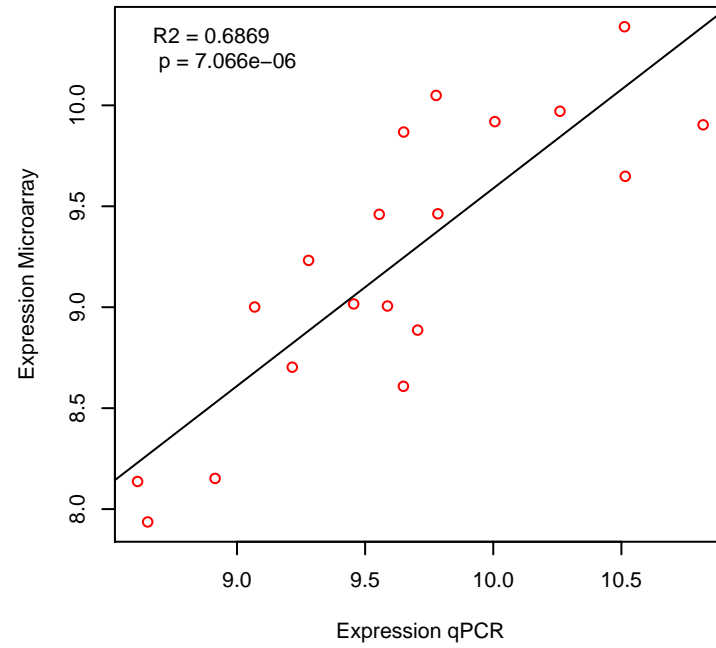**C1R**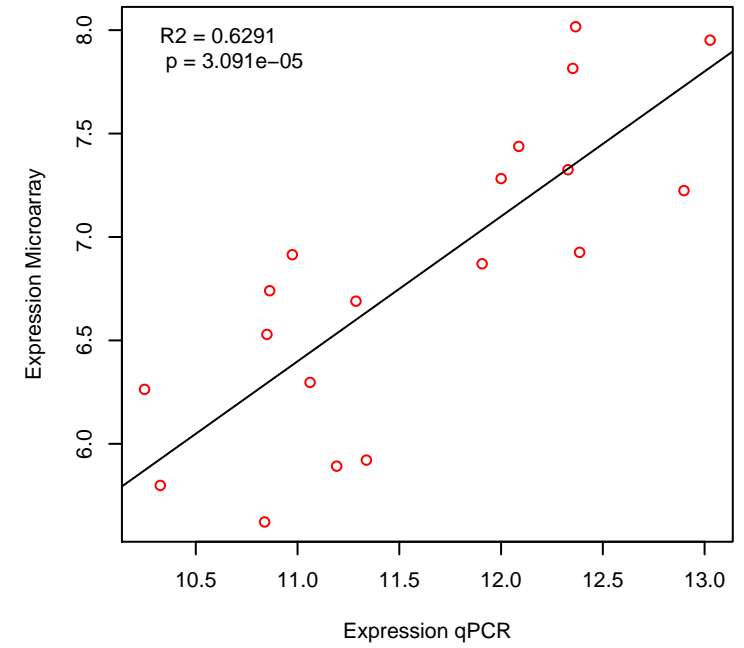**c1s**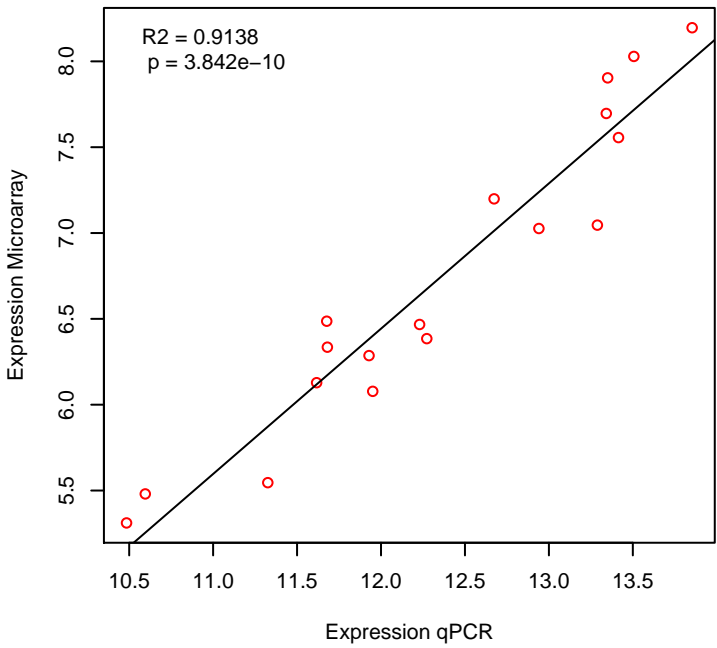**c7**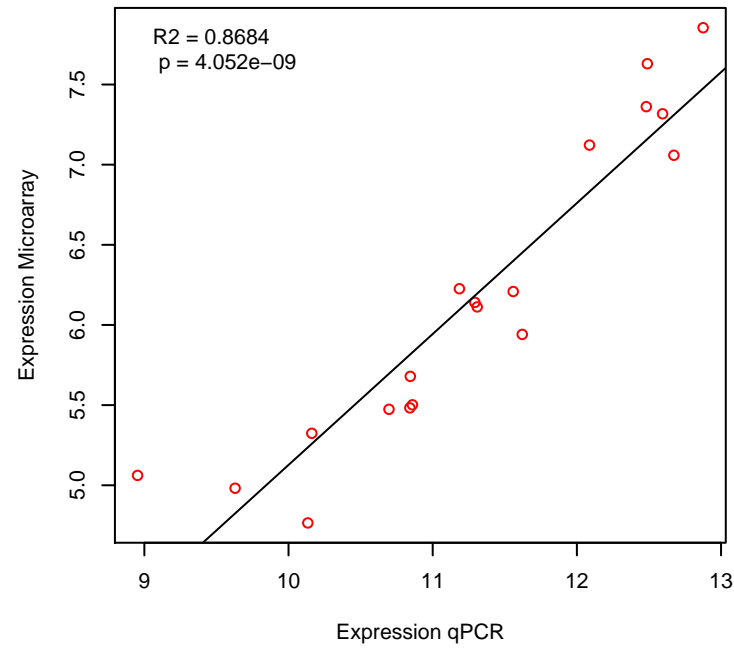**MMP2**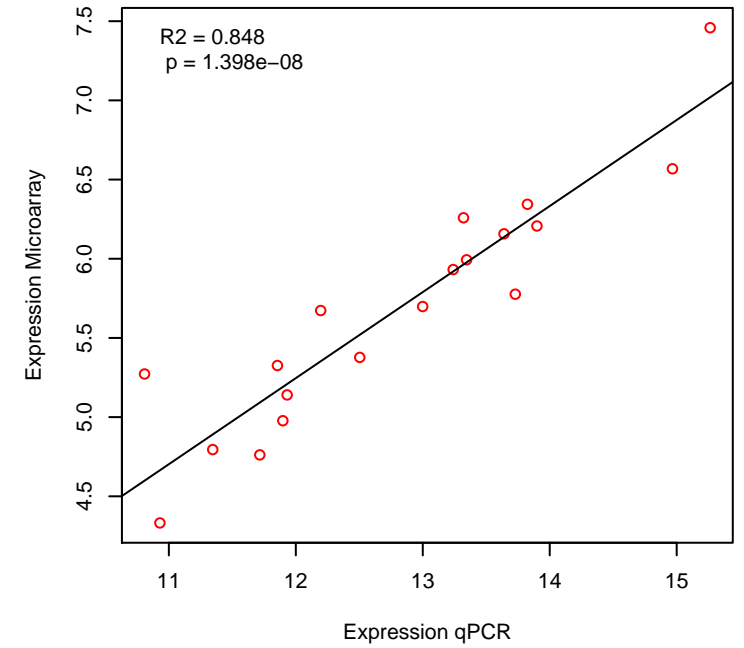

Supplement: 12864_2018_4584_MOESM6_ESM.pdf [file 12864_2018_4584_MOESM6_ESM.pdf]
